# Supplementary material for: Cardiotoxicity screening of long‐term, breast cancer survivors—The CAROLE (Cardiac‐Related Oncologic Late Effects) Study
Source: PubMed Central journal article supplement (PMC8335805; doi:10.1002/cam4.4037), 2021-07-10
Supplement: CAM4-10-5051-s002.pdf [file CAM4-10-5051-s002.pdf]

| Clinical Findings                                   |                                                  | All Participants                                   |      |              | Among treatment subgroups                                    |      |                                                                 |      |                                                           |      |                                                                        |      |
|-----------------------------------------------------|--------------------------------------------------|----------------------------------------------------|------|--------------|--------------------------------------------------------------|------|-----------------------------------------------------------------|------|-----------------------------------------------------------|------|------------------------------------------------------------------------|------|
|                                                     |                                                  | Among all<br>(n=200, unless<br>otherwise<br>noted) | %    | Total<br>(n) | Patients with<br>No<br>Cardiotoxic<br>Treatment(s)<br>(n=88) | %    | Patients with<br>Cardiotoxic<br>Chemotherapy<br>Alone<br>(n=32) | %    | Patients with<br>Cardiotoxic<br>Radiation<br>Alone (n=63) | %    | Patients w/<br>Both<br>Cardiotoxic<br>Chemo and<br>Radiation<br>(n=17) | %    |
| <b>EKG findings: Rhythm</b>                         | <i>Normal Sinus Rhythm</i>                       | 184                                                | 92.0 | 200          | 82                                                           | 93.2 | 30                                                              | 93.8 | 56                                                        | 88.9 | 16                                                                     | 94.1 |
|                                                     | Sinus Bradycardia                                | 9                                                  | 4.5  | 200          | 4                                                            | 4.6  | 1                                                               | 3.1  | 4                                                         | 6.4  | 0                                                                      | 0.0  |
|                                                     | Sinus Tachycardia                                | 0                                                  | 0.0  | 200          | 0                                                            | 0.0  | 0                                                               | 0.0  | 0                                                         | 0.0  | 0                                                                      | 0.0  |
|                                                     | Atrial Fibrillation                              | 0                                                  | 0.0  | 200          | 0                                                            | 0.0  | 0                                                               | 0.0  | 0                                                         | 0.0  | 0                                                                      | 0.0  |
|                                                     | Atrial Flutter                                   | 0                                                  | 0.0  | 200          | 0                                                            | 0.0  | 0                                                               | 0.0  | 0                                                         | 0.0  | 0                                                                      | 0.0  |
|                                                     | Supraventricular tachycardia                     | 0                                                  | 0.0  | 200          | 0                                                            | 0.0  | 0                                                               | 0.0  | 0                                                         | 0.0  | 0                                                                      | 0.0  |
|                                                     | Premature ventricular contractions               | 1                                                  | 0.5  | 200          | 0                                                            | 0.0  | 0                                                               | 0.0  | 0                                                         | 0.0  | 1                                                                      | 5.9  |
| <b>Other EKG Findings</b>                           | Heart Block - 1st degree                         | 5                                                  | 2.5  | 200          | 1                                                            | 1.1  | 1                                                               | 3.1  | 3                                                         | 4.8  | 0                                                                      | 0.0  |
|                                                     | Heart Block - 2nd degree                         | 0                                                  | 0.0  | 200          | 0                                                            | 0.0  | 0                                                               | 0.0  | 0                                                         | 0.0  | 0                                                                      | 0.0  |
|                                                     | Heart Block - 3rd degree                         | 0                                                  | 0.0  | 200          | 0                                                            | 0.0  | 0                                                               | 0.0  | 0                                                         | 0.0  | 0                                                                      | 0.0  |
|                                                     | Right bundle branch block                        | 3                                                  | 1.5  | 200          | 0                                                            | 0.0  | 0                                                               | 0.0  | 2                                                         | 3.2  | 1                                                                      | 5.9  |
|                                                     | Left bundle branch block                         | 2                                                  | 1.0  | 200          | 0                                                            | 0.0  | 2                                                               | 6.3  | 0                                                         | 0.0  | 0                                                                      | 0.0  |
|                                                     | Abnormal QT interval                             | 5                                                  | 2.5  | 200          | 4                                                            | 4.6  | 0                                                               | 0.0  | 0                                                         | 0.0  | 1                                                                      | 5.9  |
|                                                     | Abnormal QTc interval                            | 6                                                  | 3.0  | 200          | 4                                                            | 4.6  | 0                                                               | 0.0  | 1                                                         | 1.6  | 1                                                                      | 5.9  |
|                                                     | Left ventricular hypertrophy                     | 16                                                 | 8.0  | 200          | 8                                                            | 9.1  | 1                                                               | 3.1  | 6                                                         | 9.5  | 1                                                                      | 5.9  |
|                                                     | Right ventricular hypertrophy                    | 0                                                  | 0.0  | 200          | 0                                                            | 0.0  | 0                                                               | 0.0  | 0                                                         | 0.0  | 0                                                                      | 0.0  |
|                                                     | Left atrial abnormality                          | 8                                                  | 4.0  | 200          | 6                                                            | 6.8  | 0                                                               | 0.0  | 2                                                         | 3.2  | 0                                                                      | 0.0  |
|                                                     | Right atrial abnormality                         | 2                                                  | 1.0  | 200          | 1                                                            | 1.1  | 0                                                               | 0.0  | 1                                                         | 1.6  | 0                                                                      | 0.0  |
|                                                     | ST elevation                                     | 0                                                  | 0.0  | 200          | 0                                                            | 0.0  | 0                                                               | 0.0  | 0                                                         | 0.0  | 0                                                                      | 0.0  |
|                                                     | ST depression                                    | 3                                                  | 1.5  | 200          | 3                                                            | 3.4  | 0                                                               | 0.0  | 0                                                         | 0.0  | 0                                                                      | 0.0  |
|                                                     | Non-specific T-wave Changes                      | 15                                                 | 7.5  | 200          | 8                                                            | 9.1  | 1                                                               | 3.1  | 5                                                         | 7.9  | 1                                                                      | 5.9  |
|                                                     | T wave inversion                                 | 3                                                  | 1.5  | 200          | 3                                                            | 3.4  | 0                                                               | 0.0  | 0                                                         | 0.0  | 0                                                                      | 0.0  |
|                                                     | Q-waves                                          | 5                                                  | 2.5  | 200          | 4                                                            | 4.6  | 0                                                               | 0.0  | 1                                                         | 1.6  | 0                                                                      | 0.0  |
|                                                     | Low Voltage                                      | 4                                                  | 2.0  | 200          | 2                                                            | 2.3  | 0                                                               | 0.0  | 2                                                         | 3.2  | 0                                                                      | 0.0  |
|                                                     | Pacemaker/Implantable cardioverter defibrillator | 1                                                  | 0.5  | 200          | 1                                                            | 1.1  | 0                                                               | 0.0  | 0                                                         | 0.0  | 0                                                                      | 0.0  |
|                                                     | Other EKG                                        | 7                                                  | 3.5  | 200          | 5                                                            | 5.7  | 1                                                               | 3.1  | 1                                                         | 1.6  | 0                                                                      | 0.0  |
| <b>EKG Impressions</b>                              | EKG Impression- Preclinical disease              | 34                                                 | 17.2 | 198          | 18                                                           | 20.7 | 5                                                               | 15.6 | 9                                                         | 14.5 | 2                                                                      | 11.8 |
|                                                     | EKG Impression- Clinical disease                 | 20                                                 | 10.1 | 198          | 11                                                           | 12.6 | 2                                                               | 6.3  | 6                                                         | 9.7  | 1                                                                      | 5.9  |
| <b>Echocardiogram findings: Pericardial Disease</b> | <i>Subclinical Pericardial Disease</i>           | 9                                                  | 4.5  | 200          | 6                                                            | 6.8  | 1                                                               | 3.1  | 1                                                         | 1.6  | 1                                                                      | 5.9  |
|                                                     | Clinical Pericardial Disease                     | 6                                                  | 3.0  | 200          | 4                                                            | 4.6  | 2                                                               | 6.3  | 0                                                         | 0.0  | 0                                                                      | 0.0  |

|                                                     |                                                |    |      |     |    |      |   |      |   |      |   |      |
|-----------------------------------------------------|------------------------------------------------|----|------|-----|----|------|---|------|---|------|---|------|
|                                                     | Pericardial Calcification                      | 0  | 0.0  | 200 | 0  | 0.0  | 0 | 0.0  | 0 | 0.0  | 0 | 0.0  |
|                                                     | Pericardial Constriction                       | 0  | 0.0  | 200 | 0  | 0.0  | 0 | 0.0  | 0 | 0.0  | 0 | 0.0  |
|                                                     | Pericardial Effusion                           | 6  | 3.0  | 200 | 4  | 4.6  | 2 | 6.3  | 0 | 0.0  | 0 | 0.0  |
|                                                     | Cardiac Tamponade                              | 0  | 0.0  | 200 | 0  | 0.0  | 0 | 0.0  | 0 | 0.0  | 0 | 0.0  |
| <b>Hypokinesia</b>                                  | Anterior Hypokinesia                           | 0  | 0.0  | 200 | 0  | 0.0  | 0 | 0.0  | 0 | 0.0  | 0 | 0.0  |
|                                                     | Septal Hypokinesia                             | 4  | 2.0  | 200 | 2  | 2.3  | 1 | 3.1  | 1 | 1.6  | 0 | 0.0  |
|                                                     | Lateral Hypokinesia                            | 0  | 0.0  | 200 | 0  | 0.0  | 0 | 0.0  | 0 | 0.0  | 0 | 0.0  |
|                                                     | Posterior/Inferior Hypokinesia                 | 4  | 2.0  | 200 | 2  | 2.3  | 1 | 3.1  | 1 | 1.6  | 0 | 0.0  |
|                                                     | Apical Hypokinesia                             | 0  | 0.0  | 200 | 0  | 0.0  | 0 | 0.0  | 0 | 0.0  | 0 | 0.0  |
| <b>Ejection Fraction</b>                            | Normal Ejection Fraction (<52%)                | 2  | 1.0  | 200 | 1  | 1.1  | 1 | 3.1  | 0 | 0.0  | 0 | 0.0  |
|                                                     | Mildly Reduced Ejection Fraction (41-51%)      | 2  | 1.0  | 200 | 1  | 1.1  | 1 | 3.1  | 0 | 0.0  | 0 | 0.0  |
| <b>Cardiomyopathy</b>                               | Cardiomyopathy (any)                           | 9  | 4.6  | 196 | 4  | 4.6  | 2 | 6.3  | 1 | 1.6  | 2 | 11.8 |
| <b>Global Valvular Calcification and Thickening</b> | <i>Subclinical (MAC, &gt;70 yrs)</i>           | 25 | 12.5 | 200 | 16 | 18.2 | 1 | 3.1  | 5 | 7.9  | 3 | 17.6 |
|                                                     | Clinical Mitral Annular Calcification          | 19 | 9.5  | 200 | 3  | 3.4  | 3 | 9.4  | 7 | 11.1 | 6 | 35.3 |
|                                                     | Mitral Valve Calcification                     | 4  | 2.0  | 200 | 0  | 0.0  | 1 | 3.1  | 1 | 1.6  | 2 | 11.8 |
|                                                     | Aortic Valve Calcification                     | 18 | 9.0  | 200 | 5  | 5.7  | 4 | 12.5 | 3 | 4.8  | 6 | 35.3 |
|                                                     | Tricuspid Valve Calcification                  | 1  | 0.5  | 200 | 0  | 0.0  | 1 | 3.1  | 0 | 0.0  | 0 | 0.0  |
|                                                     | Pulmonic Valve Calcification                   | 0  | 0.0  | 200 | 0  | 0.0  | 0 | 0.0  | 0 | 0.0  | 0 | 0.0  |
|                                                     | <i>Mitral Valve Thickening</i>                 | 7  | 3.5  | 200 | 2  | 2.3  | 2 | 6.3  | 3 | 4.8  | 0 | 0.0  |
|                                                     | <i>Aortic Valve Thickening</i>                 | 4  | 2.0  | 200 | 2  | 2.3  | 0 | 0.0  | 2 | 3.2  | 0 | 0.0  |
|                                                     | <i>Tricuspid Valve Thickening</i>              | 0  | 0.0  | 200 | 0  | 0.0  | 0 | 0.0  | 0 | 0.0  | 0 | 0.0  |
|                                                     | <i>Pulmonic Valve Thickening</i>               | 0  | 0.0  | 200 | 0  | 0.0  | 0 | 0.0  | 0 | 0.0  | 0 | 0.0  |
| <b>Stenosis</b>                                     | <i>Trivial Stenosis of the Mitral Valve</i>    | 0  | 0.0  | 200 | 0  | 0.0  | 0 | 0.0  | 0 | 0.0  | 0 | 0.0  |
|                                                     | <i>Trivial Stenosis of the Aortic Valve</i>    | 1  | 0.5  | 200 | 0  | 0.0  | 0 | 0.0  | 1 | 1.6  | 0 | 0.0  |
|                                                     | <i>Trivial Stenosis of the Tricuspid Valve</i> | 0  | 0.0  | 200 | 0  | 0.0  | 0 | 0.0  | 0 | 0.0  | 0 | 0.0  |
|                                                     | <i>Trivial Stenosis of the Pulmonic Valve</i>  | 0  | 0.0  | 200 | 0  | 0.0  | 0 | 0.0  | 0 | 0.0  | 0 | 0.0  |
|                                                     | <i>Trivial Stenosis- Not specified</i>         | 1  | 0.5  | 200 | 1  | 1.1  | 0 | 0.0  | 0 | 0.0  | 0 | 0.0  |
|                                                     | Mild Stenosis of the Mitral Valve              | 0  | 0.0  | 200 | 0  | 0.0  | 0 | 0.0  | 0 | 0.0  | 0 | 0.0  |
|                                                     | Mild Stenosis of the Aortic Valve              | 2  | 1.0  | 200 | 0  | 0.0  | 0 | 0.0  | 2 | 3.2  | 0 | 0.0  |
|                                                     | Mild Stenosis of the Tricuspid Valve           | 0  | 0.0  | 200 | 0  | 0.0  | 0 | 0.0  | 0 | 0.0  | 0 | 0.0  |
|                                                     | Mild Stenosis of the Pulmonic Valve            | 0  | 0.0  | 200 | 0  | 0.0  | 0 | 0.0  | 0 | 0.0  | 0 | 0.0  |
|                                                     | Moderate Stenosis of Heart Valves              | 0  | 0.0  | 200 | 0  | 0.0  | 0 | 0.0  | 0 | 0.0  | 0 | 0.0  |
|                                                     | Severe Stenosis of the Mitral Valve            | 0  | 0.0  | 200 | 0  | 0.0  | 0 | 0.0  | 0 | 0.0  | 0 | 0.0  |

|                                          |                                                                            |     |      |     |     |      |     |      |     |      |     |      |
|------------------------------------------|----------------------------------------------------------------------------|-----|------|-----|-----|------|-----|------|-----|------|-----|------|
|                                          | Severe Stenosis of the Aortic Valve                                        | 1   | 0.5  | 200 | 1   | 1.1  | 0   | 0.0  | 0   | 0.0  | 0   | 0.0  |
|                                          | Severe Stenosis of the Tricuspid Valve                                     | 0   | 0.0  | 200 | 0   | 0.0  | 0   | 0.0  | 0   | 0.0  | 0   | 0.0  |
|                                          | Severe Stenosis of the Pulmonic Valve                                      | 0   | 0.0  | 200 | 0   | 0.0  | 0   | 0.0  | 0   | 0.0  | 0   | 0.0  |
|                                          | Other Mitral Valve Stenosis                                                | 0   | 0.0  | 200 | 0   | 0.0  | 0   | 0.0  | 0   | 0.0  | 0   | 0.0  |
|                                          | Other Aortic Valve Stenosis                                                | 1   | 0.5  | 200 | 1   | 1.1  | 0   | 0.0  | 0   | 0.0  | 0   | 0.0  |
|                                          | Other Tricuspid Valve Stenosis                                             | 0   | 0.0  | 200 | 0   | 0.0  | 0   | 0.0  | 0   | 0.0  | 0   | 0.0  |
|                                          | Other Pulmonic Valve Stenosis                                              | 0   | 0.0  | 200 | 0   | 0.0  | 0   | 0.0  | 0   | 0.0  | 0   | 0.0  |
| <b>Regurgitation</b>                     | <i>Trivial Regurgitation</i>                                               | 39  | 19.5 | 200 | 16  | 18.2 | 9   | 28.1 | 11  | 17.5 | 3   | 17.6 |
|                                          | <i>Trivial Aortic Regurgitation</i>                                        | 5   | 2.5  | 200 | 1   | 1.1  | 1   | 3.1  | 3   | 4.8  | 0   | 0.0  |
|                                          | <i>Trivial Tricuspid Regurgitation</i>                                     | 18  | 9.0  | 200 | 9   | 10.2 | 5   | 15.6 | 2   | 3.2  | 2   | 11.8 |
|                                          | <i>Trivial Pulmonic Regurgitation</i>                                      | 2   | 1.0  | 200 | 0   | 0.0  | 1   | 3.1  | 1   | 1.6  | 0   | 0.0  |
|                                          | <i>Unspecified Valve- Trivial Regurgitation</i>                            | 29  | 14.5 | 200 | 12  | 13.6 | 4   | 12.5 | 8   | 12.7 | 5   | 29.4 |
|                                          | <i>Mild Mitral Valve Regurgitation</i>                                     | 24  | 12.0 | 200 | 11  | 12.5 | 3   | 9.4  | 9   | 14.3 | 1   | 5.9  |
|                                          | <i>Mild Aortic Valve Regurgitation</i>                                     | 7   | 3.5  | 200 | 1   | 1.1  | 2   | 6.3  | 3   | 4.8  | 1   | 5.9  |
|                                          | <i>Mild Tricuspid Valve Regurgitation</i>                                  | 11  | 5.5  | 200 | 3   | 3.4  | 3   | 9.4  | 3   | 4.8  | 2   | 11.8 |
|                                          | <i>Mild Pulmonic Valve Regurgitation</i>                                   | 1   | 0.5  | 200 | 1   | 1.1  | 0   | 0.0  | 0   | 0.0  | 0   | 0.0  |
|                                          | <i>Moderate Mitral Valve Regurgitation</i>                                 | 7   | 3.5  | 200 | 0   | 0.0  | 2   | 6.3  | 3   | 4.8  | 2   | 11.8 |
|                                          | <i>Moderate Aortic Valve Regurgitation</i>                                 | 4   | 2.0  | 200 | 2   | 2.3  | 1   | 3.1  | 1   | 1.6  | 0   | 0.0  |
|                                          | <i>Moderate Tricuspid Valve Regurgitation</i>                              | 7   | 3.5  | 200 | 4   | 4.6  | 0   | 0.0  | 2   | 3.2  | 1   | 5.9  |
|                                          | <i>Moderate Pulmonic Valve Regurgitation</i>                               | 0   | 0.0  | 200 | 0   | 0.0  | 0   | 0.0  | 0   | 0.0  | 0   | 0.0  |
|                                          | <i>Severe Regurgitation</i>                                                | 0   | 0.0  | 200 | 0   | 0.0  | 0   | 0.0  | 0   | 0.0  | 0   | 0.0  |
| <i>Other Regurgitation</i>               | 0                                                                          | 0.0 | 200  | 0   | 0.0 | 0    | 0.0 | 0    | 0.0 | 0    | 0.0 |      |
| <b>Diastolic Dysfunction</b>             | <i>Subclinical Diastolic Dysfunction (E/A reversal and &gt;60 yrs old)</i> | 30  | 15.2 | 198 | 15  | 17.1 | 4   | 12.5 | 10  | 15.9 | 1   | 5.9  |
|                                          | <i>Clinical Diastolic Dysfunction</i>                                      | 11  | 5.6  | 198 | 4   | 4.6  | 2   | 6.3  | 3   | 4.8  | 2   | 11.8 |
| <b>Global Longitudinal Strain</b>        | <i>Abnormal Strain (&gt;-19)</i>                                           | 22  | 11.3 | 195 | 9   | 10.4 | 3   | 9.7  | 8   | 13.3 | 2   | 11.8 |
| <b>Pulmonary Hypertension</b>            | <i>Subclinical Pulmonary Hypertension (35-39 mm Hg)</i>                    | 6   | 5.0  | 119 | 3   | 5.8  | 0   | 0.0  | 2   | 5.3  | 1   | 9.1  |
|                                          | <i>Clinical Pulmonary Hypertension</i>                                     | 4   | 3.4  | 119 | 2   | 3.9  | 0   | 0.0  | 2   | 5.3  | 0   | 0.0  |
| <b>Echocardiogram Overall Impression</b> | <i>Echo Impression- Preclinical Disease</i>                                | 48  | 24.4 | 197 | 19  | 21.8 | 9   | 28.1 | 14  | 22.2 | 6   | 35.3 |
|                                          | <i>Echo Impression- Clinical Disease</i>                                   | 50  | 25.4 | 197 | 19  | 21.8 | 8   | 25.0 | 18  | 28.6 | 5   | 29.4 |
| <b>CAC CT findings</b>                   | <i>Mild Mitral Annular Calcification</i>                                   | 32  | 16   | 199 | 12  | 13.6 | 2   | 6.3  | 15  | 23.8 | 3   | 17.6 |
|                                          | <i>Moderate-Severe Mitral Annular Calcification</i>                        | 2   | 1.0  | 199 | 1   | 1.1  | 1   | 3.1  | 0   | 0.0  | 0   | 0.0  |
|                                          | <i>Aortic valve calcification</i>                                          | 39  | 19.6 | 199 | 14  | 15.9 | 3   | 9.4  | 17  | 27.0 | 5   | 29.4 |

|                                  |                                            |    |      |     |    |      |    |      |    |      |   |      |
|----------------------------------|--------------------------------------------|----|------|-----|----|------|----|------|----|------|---|------|
|                                  | Overall Agatston Score (>0)                | 77 | 39.1 | 197 | 35 | 39.8 | 8  | 25.0 | 29 | 46.0 | 5 | 29.4 |
|                                  | Left Main Score (>0)                       | 24 | 12.1 | 198 | 9  | 10.2 | 1  | 3.1  | 13 | 21.3 | 1 | 5.9  |
|                                  | Left Circumflex Artery Score (>0)          | 30 | 15.1 | 199 | 12 | 13.6 | 3  | 9.4  | 12 | 19.1 | 3 | 17.6 |
|                                  | Right Coronary Artery Score (>0)           | 39 | 19.6 | 199 | 17 | 19.3 | 7  | 21.9 | 12 | 19.1 | 3 | 17.6 |
|                                  | Left Anterior Descending Artery Score (>0) | 70 | 35.4 | 198 | 33 | 37.5 | 6  | 19.4 | 26 | 41.9 | 5 | 29.4 |
|                                  | Mild Pericardial Effusion                  | 6  | 3.0  | 200 | 4  | 4.6  | 1  | 3.1  | 1  | 1.6  | 0 | 0.0  |
|                                  | Moderate-Severe Pericardial Effusion       | 1  | 0.5  | 200 | 0  | 0.0  | 0  | 0.0  | 1  | 1.6  | 0 | 0.0  |
| <b>CAC CT Overall Impression</b> | CAC Impression – Preclinical Disease       | 10 | 5.0  | 200 | 4  | 4.6  | 1  | 3.1  | 3  | 4.8  | 2 | 11.8 |
|                                  | CAC impression- Clinical Disease           | 91 | 45.5 | 200 | 41 | 46.6 | 10 | 31.3 | 35 | 55.6 | 5 | 29.4 |

*Subclinical or within range of normal – tracked for research, but not sufficient for endpoints of preclinical or clinical disease*

Data collected but not intended for the study's cardiac endpoints (not shown above): Pericardial fat pad, Thickened pericardium, Isolated basal inferior hypokinesis (normal variant), MAC Agatston score, AV Agatston score, Aortic root Agatston score, Aortic valve calcification, Descending thoracic aorta Agatston score, Caliber Aorta in oblique plane, Caliber Aorta in axial plane, Caliber Main Pulmonary Artery, Lipomatous hypertrophy, Lipomatous infiltration of the interatrial septum, Intramyocardial fat, Epicardial fat thickness, Qualitative size of heart chambers, Lung abnormality, Hiatal hernia, Esophageal abnormality, Lymph node abnormality, Liver abnormality, and Other abnormalities)

Supplemental Figure 1. Detailed report of tracked cardiac imaging findings from EKG, TTE, and CAC CT and overall impression per modality.
